# Supplementary material
Source: Springer Nature journal article supplement (https://www.springermedizin.de/resource/supplementary/12911_2010_408_MOESM6_ESM.pdf/9525662)

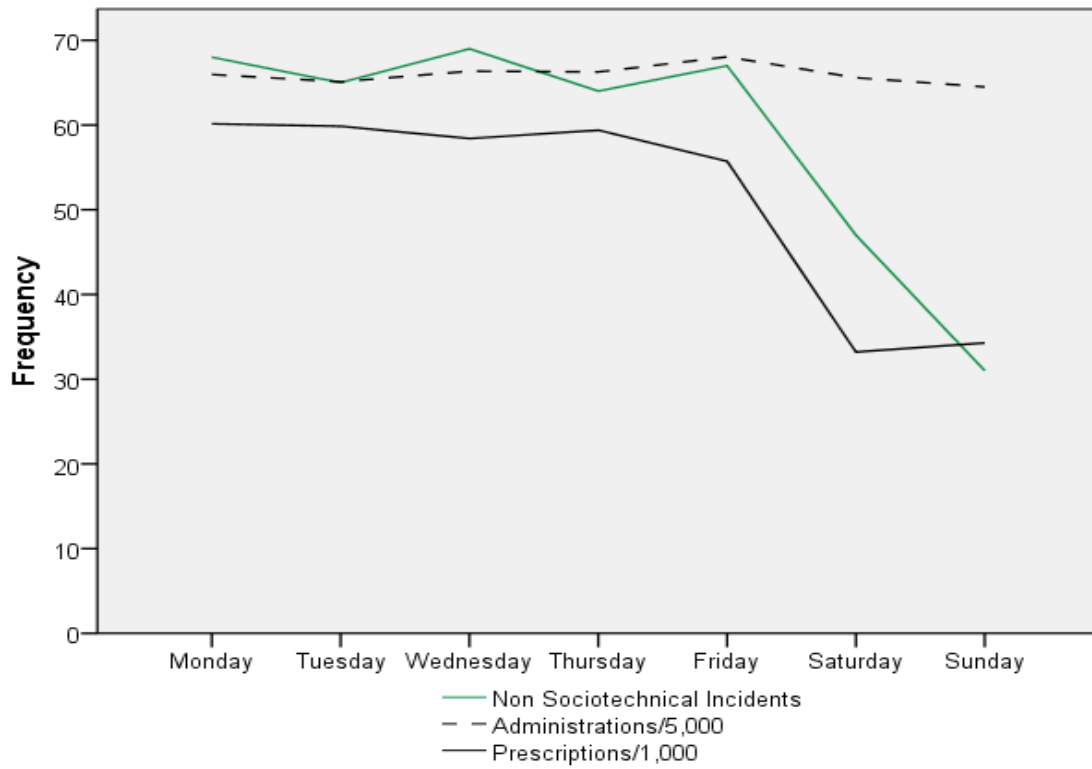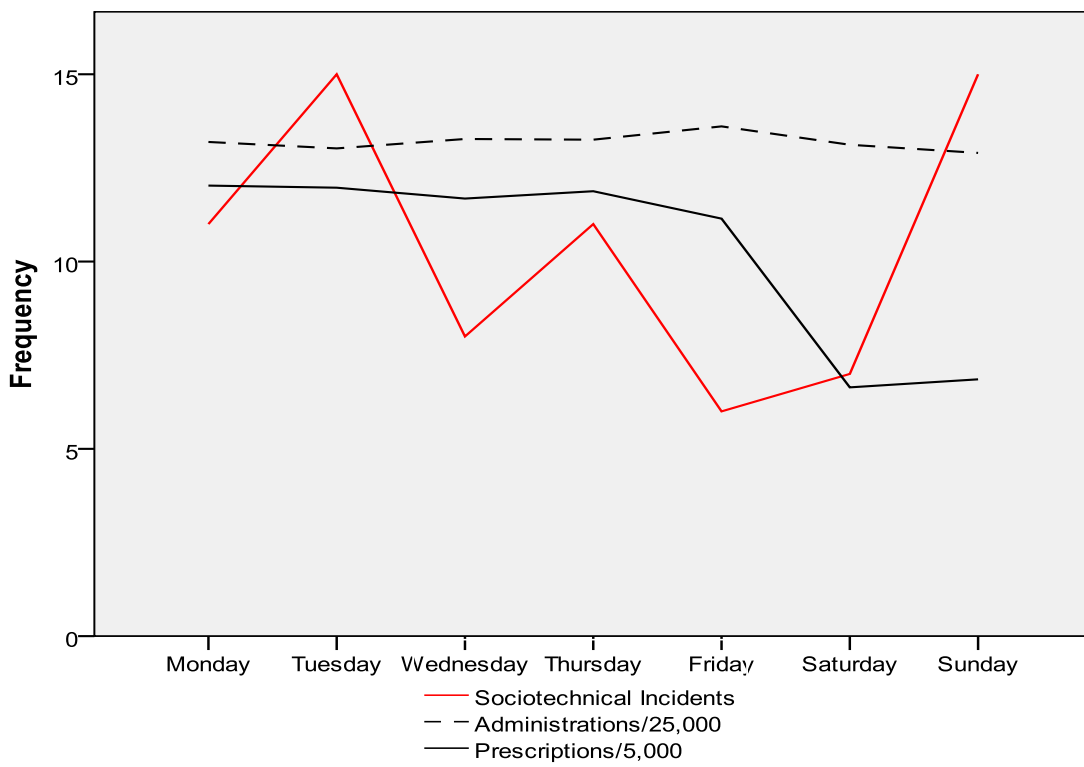

Supplement: MOESM6 [file 9525662]
